# Supplementary material for: Diversity of miRNAs, siRNAs, and piRNAs across 25 Drosophila cell lines
Source: HighWire-hosted journal article supplement (doi:10.1101/gr.161554.113), 2014-07-01
Supplement: TableS1_libraries_used.xlsx [file TableS1_libraries_used.xlsx]

## Sheet: small RNA-seq
GEO	ModEncode	Short Description	used in cell line vs tissue comparison	used in novel miRNA annotation
GSM450972		BG3 small RNAs BioRep-1 TechRep-1		Y
GSM467729		Dmel_wt_sRNAseq		Y
GSM467730		Dmel_r2d2_sRNAseq		Y
GSM467731		Dmel_loq_sRNAseq		Y
GSM180329		adult bodies (female bodies, male bodies)		Y
GSM399106	modENCODE_2555	female body #2	Y	Y
GSM399107	modENCODE_2554	male body #2	Y	Y
GSM286602	modENCODE_739	male body	Y	Y
GSM286603	modENCODE_743	female body	Y	Y
GSM180335		imaginal discs		Y
GSM399105	modENCODE_2376	disk #2		Y
GSM275691	modENCODE_742	imaginal disc		Y
GSM180330		very early embryo (0-1)	Y	Y
GSM180331		early embryo (2-6)	Y	Y
GSM180332		mid embryo (6-10)	Y	Y
GSM180333		late embryo (12-24)	Y	Y
GSM327627		Embryo_0-2hrs_rep1_HAR_0_2hr_Emb	Y	Y
GSM327629		Embryo_0-2hrs_rep1_LK_0_2hr_Emb	Y	Y
GSM327628		Embryo_0-2hrs_rep1_NA_0_2hr_Emb	Y	Y
GSM327625		Embryo_0-2hrs_rep1_w1118_0_2hr_Emb	Y	Y
GSM327626		Embryo_0-2hrs_rep1_wK_0_2hr_Emb	Y	Y
GSM286605	modENCODE_740	2-6h #1 (8)	Y	Y
GSM286606	modENCODE_752	2-6h #2 (9)	Y	Y
GSM286607	modENCODE_754	6-10h #1 (10)	Y	Y
GSM286611	modENCODE_753	6-10h #2 (11)	Y	Y
GSM286613	modENCODE_745	0-1hr #1 (A)	Y	Y
S6		0-1,2-6,6-10h embryo	Y	Y
GSM364902	modENCODE_2741	12-24hr embryo	Y	Y
GSM286604	modENCODE_755	0-1h #3 (7)	Y	Y
GSM609239	modENCODE_2971	IR-	Y	Y
GSM609240	modENCODE_2972	IR+	Y	Y
GSM609229	modENCODE_2743	embryo 2-6hr	Y	Y
GSM609238	modENCODE_2742	embryo 14-24hr	Y	Y
GSM343287		Drosophila Toll 10b mutant embryos		Y
GSM180328		adult heads (female heads, male heads)		Y
GSM286601	modENCODE_747	male head	Y	Y
GSM240749	modENCODE_737	female head	Y	Y
GSM322533	modENCODE_750	female head #1	Y	Y
GSM322543	modENCODE_751	male head #1	Y	Y
GSM609247	modENCODE_3190	heat female head	Y	Y
GSM609251	modENCODE_3195	aged female head	Y	Y
SRR029608		total small RNAs from hen1 heterozygous flies	Y	Y
SRR029633		total small RNAs from hen1 homozygous flies	Y	Y
GSM246084		D. melanogaster adult male heads 454		Y
GSM239041		fly heads, non beta-eliminated	Y	Y
GSM239050		fly heads, beta-eliminated	Y	Y
GSM313160		dcr-2 homozygous, oxidized	Y	Y
GSM313161		dcr-2 heterozygous, oxidized	Y	Y
GSM313162		dcr-2 homozygous, untreated	Y	Y
GSM313163		dcr-2 heterozygous, untreated	Y	Y
GSM313164		ago2 homozygous, oxidized (technical replicate #1)	Y	Y
GSM313165		ago2 homozygous, oxidized (technical replicate #2)	Y	Y
GSM312995		WT, oxidized	Y	Y
GSM278573		WT_females_beta-eliminated	Y	Y
GSM278707		IR_non-beta-eliminated	Y	Y
GSM278706		WT_females_non-beta-eliminated	Y	Y
GSM278575		IR_beta-eliminated	Y	Y
GSM278695		WT_males_non-beta-eliminated	Y	Y
GSM278574		WT_males_beta-eliminated	Y	Y
GSM278696		dcr-2_non-beta-eliminated	Y	Y
GSM278692		dcr-2_beta-eliminated	Y	Y
GSM278708		ago2_non-beta-eliminated	Y	Y
GSM278648		ago2_beta-eliminated	Y	Y
GSM278704		ago2_untreated	Y	Y
GSM278693		ago2_oxidized	Y	Y
GSM278705		heterozygous_dcr-2_untreated	Y	Y
GSM278703		homozygous_dcr-2_untreated	Y	Y
GSM466487		Total small RNAs from Oregon R	Y	Y
GSM466488		2'-O-methylated small RNAs from Oregon R	Y	Y
GSM466488		2'-O-methylated small RNAs from Oregon R	Y	Y
GSM466489		Ago1-associated small RNAs from Oregon R	Y	Y
GSM466490		Total small RNAs from dcr-2 heterozygous flies	Y	Y
GSM466491		2'-O-methylated small RNAs from dcr-2 heterozygous flies	Y	Y
GSM466492		Total small RNAs from dcr-2 homozygous flies	Y	Y
GSM466493		2'-O-methylated small RNAs from dcr-2 homozygous flies	Y	Y
GSM466494		Total small RNAs from r2d2 heterozygous flies	Y	Y
GSM466495		2'-O-methylated small RNAs from r2d2 heterozygous flies	Y	Y
GSM466496		Total small RNAs from r2d2 homozygous flies	Y	Y
GSM466497		2'-O-methylated small RNAs from r2d2 homozygous flies	Y	Y
GSM466489		Ago1-associated small RNAs from Oregon R	Y	Y
GSM272653	modENCODE_738	KC -48 #1		Y
GSM399110	modENCODE_2374	KC-48 #2		Y
GSM609243	modENCODE_2974	KC+48 #1		Y
GSM609244	modENCODE_2974	KC+48 #2		Y
GSM180334		larvae: 1st instar and 3rd instars		Y
GSM322245	modENCODE_749	3rd inster #1	Y	Y
GSM322208	modENCODE_748	3rd inster #2	Y	Y
GSM360256	modENCODE_762	1st instar #1	Y	Y
GSM360257	modENCODE_2546	1st instar #2	Y	Y
GSM154618		23-29 nucleotide RNAs from Drosophila melanogaster ovaries		Y
GSM154620		piRNAs associated with Piwi from Drosophila melanogaster ovaries		Y
GSM154621		piRNAs associated with Ago3 from Drosophila melanogaster ovaries		Y
GSM154622		piRNAs associated with Aubergine from Drosophila melanogaster ovaries		Y
GSM280082	modENCODE_773	WT ovaries (18-29nt)	Y	Y
GSM280083	modENCODE_526	dcr-2-/- ovaries (18-29nt)	Y	Y
GSM280084	modENCODE_774	loqs-/- ovaries (18-29nt)	Y	Y
GSM280086	modENCODE_2381	WT ovaries (AGO2IP)	Y	Y
GSM379050		Armi Heterozygote		Y
GSM379051		Armi Mutant		Y
GSM379052		Aub Heterozygote		Y
GSM379053		Aub Mutant		Y
GSM379054		Flam Heterozygote		Y
GSM379055		Flam Mutant		Y
GSM379056		Krimp Heterozygote		Y
GSM379057		Krimp Mutant		Y
GSM379058		Piwi Heterozygote		Y
GSM379059		Piwi Mutant		Y
GSM379060		SpnE Heterozygote		Y
GSM379061		Squ Heterozygote		Y
GSM379062		Squ Mutant		Y
GSM379063		Vasa Heterozygote		Y
GSM379064		Vasa Mutant		Y
GSM379065		Zuc Heterozygote		Y
GSM379066		Zuc Mutant		Y
GSM379067		SpnE Mutant		Y
GSM327622		Ovary_rep1_Har_P		Y
GSM327633		Ovary_rep1_LK(fem)_x_Har(male)_F1		Y
GSM327624		Ovary_rep1_LK_P		Y
GSM327634		Ovary_rep1_NA(fem)_x_Har(male)_F1		Y
GSM327623		Ovary_rep1_NA_P		Y
GSM327632		Ovary_rep1_w1118(fem)_x_Har(male)_F1		Y
GSM327630		Ovary_rep1_w1118(fem)_x_wK(male)_F1		Y
GSM327620		Ovary_rep1_w1118_P		Y
GSM327631		Ovary_rep1_wK(fem)_x_w1118(male)_F1		Y
GSM327621		Ovary_rep1_wK_P		Y
GSM548583		A2_ovaries_total	Y	Y
GSM548585		yw67c23(2)_ovaries_total	Y	Y
GSM548586		A2_ovaries_FLAG-Ago2	Y	Y
GSM548587		A2_ovaries_FLAG-Aub	Y	Y
GSM548588		A2_ovaries_FLAG-Piwi	Y	Y
GSM548590		A2_ovaries_Ago3	Y	Y
GSM548592		hs-Penelope_ ovaries_total	Y	Y
GSM577958		Piwi bound piRNAs from tj GAL4 > RNAi-aub ovaries		Y
GSM577959		Piwi bound piRNAs from tj GAL4 > RNAi-piwi ovaries		Y
GSM577960		Piwi bound piRNAs from tj GAL4 > RNAi-armi ovaries		Y
GSM577961		Piwi bound piRNAs from tj GAL4 > RNAi-zuc ovaries		Y
GSM577962		Piwi bound piRNAs from tj GAL4 > RNAi-fs(1)Yb ovaries		Y
GSM593297		zuc_H-Y_ovaries		Y
GSM593298		zuc_het(H-Y)_ovaries		Y
GSM593299		Piwi-IP_zuc_mut_ovaries		Y
GSM593300		Piwi-IP_zuc_het(mut)_ovaries		Y
GSM593301		Piwi-IP_zuc_H-Y_ovaries		Y
GSM593302		Piwi-IP_zuc_het(H-Y)_ovaries		Y
GSM593303		Piwi-IP_squ_mut_ovaries		Y
GSM593304		Piwi-IP_squ_het_ovaries		Y
GSM744629		strain: vret148-60/TM6genotype/variation: Vret Heterozygote	Y	Y
GSM744630		strain: vret148-60/vret148-60genotype/variation: Vret Mutant	Y	Y
GSM744619		strain: egg1473/ Df(2R)Dll-Mpgenotype/variation: dSETDB1 Mutant	Y	Y
GSM744620		strain: bam(delta)86/bam(delta)86genotype/variation: Bam Mutant	Y	Y
GSM767594		genotype: Df(3L)armi-delta1/TM3SbStage: from 5-6 days old flies	Y	Y
GSM767595		genotype: DF(3L)armi-delta1/DF(3L)armi-delta1Stage: from 5-6 days old flies	Y	Y
GSM767596		genotype: CG4771-delta1/TM3Sbstage: from 5-6 days old flies	Y	Y
GSM767597		genotype: CG47711-delta1/CG4771-delta1stage: from 5-6 days old flies	Y	Y
GSM767598		genotype: fs(1)yb_72/Fm6 or fs(1)yb_4/Fm6stage: from 5-6 days old flies	Y	Y
GSM767599		genotype: fs(1)yb_72/fs(1)yb_4stage: from 5-6 days old flies	Y	Y
GSM767600		genotype: zuc_hm27/Cyo or zuc_cd761/Cyostage: from 5-6 days old flies	Y	Y
GSM767601		genotype: zuc_hm27/zuc_cd761stage: from 5-6 days old flies	Y	Y
GSM609230	modENCODE_2744	CS,ovary,AGO1IP	Y	Y
GSM609231	modENCODE_2746	ago2[414], ovary, AGO1IP	Y	Y
GSM609236	modENCODE_2833	dcr-2[L811fsX], ovary, AGO1IP		Y
GSM609233	modENCODE_2749	r2d2[1], ovary, AGO1IP		Y
GSM609232	modENCODE_2748	r2d2[1] ovary total RNA ¬†		Y
GSM628271	modENCODE_3314	r2d2[1] ovary total RNA ¬†		Y
GSM609237	modENCODE_2834	ago2[414] ovary total RNA		Y
GSM628272	modENCODE_3315	ago2[414] ovary total RNA		Y
GSE24545	modENCODE_2976	CS ovary total RNA	Y	Y
GSE24544	modENCODE_2975	dcr-2[L811fsX] ovary total RNA	Y	Y
GSM231091		PIWI-associated piRNA in Drosophila melanogaster ovary		Y
SRX002202		Ago3 heterozygotes, oxidized	Y	Y
SRX002237		Ago3 trans-heterozygotes, oxidized	Y	Y
SRX002238		Aub heterozygotes, oxidized	Y	Y
SRX002239		Aub trans-heterozygotes, oxidized	Y	Y
SRX002240		Aub IP in Ago3 heterozygotes	Y	Y
SRX002241		Piwi IP in Ago3 heterozygotes	Y	Y
SRX002242		Aub IP in Ago3 trans-heterozygotes	Y	Y
SRX002243		Piwi IP in Ago3 trans-heterozygotes	Y	Y
SRX002244		Ago3 IP in heterozygotes	Y	Y
SRX002245		wt, oxidized	Y	Y
GSM180336		pupae: 0-1 day, 0-2 day, 2-4 day		Y
GSM322219	modENCODE_757	2-4day pupae #1	Y	Y
GSM322338	modENCODE_758	2-4day pupae#2	Y	Y
GSM360260	modENCODE_2543	0-1d Pupae (w)	Y	Y
GSM360262	modENCODE_2556	0-2d pupae	Y	Y
GSM786604		transfected with dsRNA targeting nibblercell type: Schneider 2 (S2) cellsoxidation		Y
GSM786605		transfected with dsRNA targeting luciferasecell type: Schneider 2 (S2) cellsoxidation		Y
GSM786606		transfected with dsRNA targeting nibblercell type: Schneider 2 (S2) cellsoxidation		Y
GSM786607		transfected with dsRNA targeting luciferasecell type: Schneider 2 (S2) cellsoxidation		Y
SRX008034		RNA bound by P19 protein		Y
SRR023400		total RNA extracted from P19 cells		Y
SRR023402		total RNA extracted from NLS-P19 cells		Y
SRX008041		RNA bound by NLS-P19 protein		Y
GSM180337		tissue culture cells (S2 only)		Y
GSM180337		RNA Library from S2 control cells		Y
GSM430030		untreated (mock)		Y
GSM430031		dcr-1 knockdown		Y
GSM430032		dcr-2 knockdown		Y
GSM430033		loqs-ORF knockdown		Y
GSM430034		r2d2 knockdown		Y
GSM430035		lacZ knockdown		Y
GSM424739		S2 parental		Y
GSM424740		S2 pKF63 stably transfected		Y
GSM424741		S2 pKF63 transiently transfected		Y
GSM442732		mock oxidized		Y
GSM442733		ago1 knockdown		Y
GSM442734		ago2 knockdown		Y
GSM609241	modENCODE_2973	s2+48 #1		Y
GSM609242	modENCODE_2973	s2+48 #2		Y
GSM272651	modENCODE_741	S2-48,+48, KC-48, +48 mix		Y
GSM266765		Siomi Lab fruit fly S2 AGO2 Cloned Sequences v1.0		Y
GSM239051		S2 cells, beta-eliminated		Y
GSM239052		S2 cells, non beta-eliminated		Y
GSM272652	modENCODE_746	S2 -48 Biological Replicate #1		Y
GSM361908	modENCODE_2725	s2-48 Biological Replicate #2		Y
GSM280087	modENCODE_2379	S2cell (AGO2IP)		Y
GSM280088	modENCODE_2380	S2cell (AGO1IP)		Y
GSM442735		AGO1 IP dcr2 knockdown		Y
GSM442736		AGO2 IP dcr2 knockdown		Y
GSM666011		Drosophila S2-NP cells		Y
GSM666012		Drosophila S2-NP cells		Y
GSM666013		Drosophila S2-NP cells		Y
GSM280085	modENCODE_772	WT testes (18-24nt)	Y	Y
GSM548582		A2_testes_total	Y	Y
GSM548584		yw67c23(2)_testes_total	Y	Y
GSM548589		A1_testes_total	Y	Y
GSM548591		hs-Penelope_testes_total	Y	Y
GSM811191		age: 2-3dgender: male:female = 1:1tissue: whole flygenotype: control wild type (w, 5905)		Y
GSM811192		age: 2-3dgender: male:female = 1:1tissue: whole flygenotype: nbr[f02257]		Y
GSM609223	modENCODE_2008	male, one day		Y
GSM609224	modENCODE_2009	female, one day		Y
GSM609234	modENCODE_2751	CS male total RNA		Y
