# Supplementary material for: Diversity of miRNAs, siRNAs, and piRNAs across 25 Drosophila cell lines
Source: HighWire-hosted journal article supplement (doi:10.1101/gr.161554.113), 2014-07-01
Supplement: TableS4_Novel_miRNA.xlsx [file TableS4_Novel_miRNA.xlsx]

## Sheet: Table_S4_miRNAList
#name	URL	chrom	start	end	strand	precursorlen	total_perfect_sense_count	total_perfect_antisense_count	mature_perfect_hits	mature_perfect	star_perfect_hits	star_perfect	mature_AGO1_perfect	mature_AGO2_perfect	star_AGO1_perfect	star_AGO2_perfect	Gene	Locale	Final Call
dme-mir-9388	dme-mir-9388	chr3L	22938231	22938293	+	63	117449	0	1	116807	2	629.992	2149.5	40893.8	2.084	335.248		intergenic	Novel miRNA
dme-mir-9369	dme-mir-9369	chrX	19445351	19445412	+	62	109513	0	1	64183	1	45908	16	1	30	0		intergenic	Novel miRNA
dme-mir-9370	dme-mir-9370	chrX	11604285	11604334	-	50	8848	2	1	8806	1	43	510	91	2	0	Amun	three_prime_UTR	Novel miRNA
dme-mir-9371	dme-mir-9371	chr3R	5814842	5814902	+	61	5459	1	1	4330	1	1110	319	0	104	1	Glut4EF	three_prime_UTR	Novel miRNA
dme-mir-9372	dme-mir-9372	chrX	527724	527784	-	61	1370	37	1	937	1	376	29	0	9	0	Dredd	CDS	Novel miRNA
dme-mir-9373	dme-mir-9373	chr3R	15446802	15446860	-	59	739	11	1	650	1	86	5	0	0	0	CG6231	five_prime_UTR	Novel miRNA
dme-mir-9374	dme-mir-9374	chr2L	21238301	21238361	+	61	384	7	1	262	1	107	3	1	4	0	Hr39	five_prime_UTR	Novel miRNA
dme-mir-9375	dme-mir-9375	chr3R	2277273	2277331	-	59	484	3	1	258	1	263	3	0	6	0	CG9727	three_prime_UTR	Novel miRNA
dme-mir-9376	dme-mir-9376	chr2R	18834390	18834465	+	76	293	0	1	226	1	71	7	0	1	0		intergenic	Novel miRNA
dme-mir-9377	dme-mir-9377	chrX	12559250	12559301	+	52	213	2	1	197	1	23	3	0	0	1	Tis11	intronic	Novel miRNA
dme-mir-9378	dme-mir-9378	chr2L	10751877	10751938	-	62	215	2	1	179	1	22	2	0	0	0	CG17124	intronic	Novel miRNA
dme-mir-9379	dme-mir-9379	chr2R	9740350	9740406	-	57	218	0	1	165	1	80	4	0	0	0	CG30485	antisense_to_3pUTR	Novel miRNA
dme-mir-9380	dme-mir-9380	chr3R	4174424	4174500	-	77	253	37	1	174	1	91	18	1	2	0	CG7352	antisense_to_CDS	Novel miRNA
dme-mir-9381	dme-mir-9381	chr3R	19809218	19809291	+	74	156	6	1	164	1	61	2	1	3	10	CG31451	five_prime_UTR	Novel miRNA
dme-mir-9382	dme-mir-9382	chr2L	12724957	12725025	+	69	193	0	1	117	1	76	0	0	15	1	MRP	intronic	Novel miRNA
dme-mir-9383	dme-mir-9383	chr3R	11047517	11047577	+	61	157	4	1	91	1	65	6	0	0	1	CG12241	CDS	Novel miRNA
dme-mir-9384	dme-mir-9384	chr3R	574386	574445	-	60	111	0	1	70	1	42	4	0	1	0	tacc	intronic	Novel miRNA
dme-mir-9385	dme-mir-9385	chr4	421329	421391	-	63	68	8	1	42	1	24	3	2	1	2		intergenic	Novel miRNA
